# Supplementary material
Source: publisher site journal article supplement (https://static.cambridge.org/content/id/urn:cambridge.org:id:article:S0990744006000039/resource/name/alr84_appendix.xls)
Supplement: Supplementary file 1 [file alr84_appendix.xls]

## Sheet: Feuil1
Aquat. Living Resour. 2006, vol. 19, n°1. Tejerina-Garro F.L., Mérona B. de, Oberdorff T., Hugueny B. A fish-based index of large river quality for French Guiana (South America): method and preliminary results. APPENDIX. Fish species, taxonomic classification, trophic position, and the number of fish captured in the 53 samples -of 27 reaches in 7 hydrographic basins- carried out for the construct…
Species and Authority	Taxonomy	Trophic	Camopi River May 1999	Camopi River Nov. 1998	Comté River upstream April 1999	Comté River upstream October 1998	Comté River downstream April 1999	Comté River downstream October 1998	Sinnamary River - Dalles June 1999	Sinnamary River - Dalles Nov. 1999	Grand Inini River Jan. 1999	Grand Inini River June 1999	Karouabo River April 1999	Karouabo River May 2000	Karouabo River May 1998	Sinnamary River - Kerenroch July 1999	Sinnamary River - Kerenroch Dec. 1999	Kounana River upstream July 1998	Kounana River upstream Dec. 1998	Kounana River downstream July 1998	Kounana River downstream Dec. 1998	Koursibo River June 1999	Koursibo River Dec. 1999	Maroni River - Langa Tabiki June 1999	Maroni River - Langa Tabiki Oct. 1999	Leblond River June 1999	Leblond River Dec. 1998	Malmanoury River April 1999	Malmanoury River May 2000	Maroni River - Maripasoula upstream Jan. 1999	Maroni River - Maripasoula upstream June 1999	Maroni River - Maripasoula downstream Jan. 1999	Maroni River - Maripasoula downstream June 1999	Orapu River upstream July 1998	Orapu River upstream Dec. 1998	Orapu River downstream July 1998	Orapu River downstream Dec. 1998	Oyapok River - Camopi April 1999	Oyapok River -St. Georges May 1999	Des Pères River April 1999	Des Pères River May 2000	Petit Inini River Jan. 1999	Petit Inini River June 1999	Sinnamary River - Roros June 1998	Sinnamary River - Roros Nov. 1998	Sinnamary River - Saulnier June 1998	Sinnamary River - Saulnier Dec. 1999	Inini River Jan. 1999	Inini River June 1999
Acestrorhynchus falcatus (Bloch, 1794)	Characidae	Piscivore			1	3	2	2	1	8			4	15	34			16	12	18	2		2			1		14	31					5	1	2	3			1	3			11	2
Acestrorhynchus guianensis Menezes, 1969	Characidae	Piscivore	43	14	13	22	2	18	3	8	16						1	9		48	48	4	2	2	1	8	2			24	2	13		18	2	2	6	23	46				1	12	11	1		6	3
Acnodon oligacanthus (Müller et Troschel, 1844)	Serrasalmidae	Terrestrial invertivore																						2	2
Ageneiosus brevifilis (Cuvier et Valenciennes, 1857)	Benthic Siluriforme	Piscivore		7		6	4	2			5	2						23	21	6	37			1						9	1	2	2	3	4	1	12	2	1			8	3					6	3
Ageneiosus dentatus Kner, 1857	Benthic Siluriforme	Aquatic invertivore			10			6																										1
Anchovia surinamensis (Blecker, 1866)	Engraulidae	Aquatic invertivore						44								2				2	6				2										3		14										2
Anchoviella lepidentostole (Fowler, 1911)	Engraulidae	Aquatic invertivore		1				1
Ancistrus hoplogenys (Günther, 1864)	Benthic Siluriforme	Detritivore						4											1		2								3
Ancistrus leucostictus (Günther, 1864)	Benthic Siluriforme	Detritivore																	2
Ancistrus temminckii (Cuvier et Valenciennes, 1840)	Benthic Siluriforme	Detritivore	2																4																	1		1
Anostomus brevior Géry, 1960	Anostomidae	Detritivore	1																																									15
Arius couma (Valenciennes, 1839)	Ariidae	Piscivore																																													1
Arius herzbergii (Bloch, 1794)	Ariidae	Piscivore														1																									1						1
Astyanax abramoides Eigenmann, 1909	Characidae	unknown	1		2
Astyanax bimaculatus (Linné, 1758)	Characidae	Terrestrial invertivore									1			5		17	5				1	1	1				2	3	5															1	9	5
Jupiaba keithi Géry, Planquette et Le Bail, 1996	Characidae	Omnivore		1		3					3						2	2					2				1			3	1													16		4
Jupiaba meunieri Géry, Planquette et Le Bail, 1996	Characidae	Herbivore									11																				1												1	8				3
Astyanax validus Géry, Planquette et Le Bail, 1991	Characidae	Terrestrial invertivore			1
Auchenipterus nuchalis (Spix, 1829)	Auchenipteridae	Terrestrial invertivore	4	13	40	14	37	26	4		10	2						1		95	47		63	15	8	1	22			16	2	75	5	10	4	18	17	17	8	27	3	1	5	18	2	25	4	4
Bivibranchia bimaculata Vari, 1985	Hemiodidae	Omnivore									1												1	3						1												1						6
Bivibranchia simulata Géry, Planquette et Le Bail, 1991	Hemiodidae	Aquatic invertivore	6																																			3	1										1
Boulengerella lucia (Cuvier, 1817)	Ctenoluciidae	Piscivore	10	5																																		10	14
Brycon falcatus Müller et Troschel, 1844	Characidae	Herbivore																						2						3		3	3										2
Brycon pesu Müller et Troschel, 1845	Characidae	Terrestrial invertivore									10	3												8	10					12	7	15	11																5
Bryconops affinis (Günther, 1864)	Characidae	Terrestrial invertivore						5	12		14	7									1	18	2	16		1				67	87	37	88										3	53	4
Bryconops caudomaculatus (Günther, 1869)	Characidae	Terrestrial invertivore	127	22	204	3	43	26	8	2	3	1				7	3	67	24	126	37	2	2	14	4					25	9	32	20	27	4	24	28	174	25				4	13	4				2
Bryconops cyrtogaster (Norman, 1926)	Characidae	Terrestrial invertivore	74	48																																		15	6
Bryconops melanurus (Bloch, 1795)	Characidae	Omnivore				1			15	1		1										14	3			3																		70	3
Callichthys callichthys (Linné, 1758)	Benthic Siluriforme	Aquatic invertivore																												1
Centropomus parallelus Bey, 1860	Centropomidae	Piscivore						1																				1												1						2
Chalceus macrolepidotus Cuvier, 1817	Characidae	Terrestrial invertivore									5																			4		1																7
Charax pauciradiatus Günther, 1864	Characidae	Aquatic invertivore	2	1	4	41		3			7	1						7	9	13	24			1	3						1	2	2	12	15		7		1			3				4	3	10	1
Chilodus zunevei Puyo, 1945	Curimatidae	Detritivore								6																									2									12
Cichla ocellaris Schneider, 1801	Cichlidae	Piscivore
Cichlasoma amazonarum Kullander, 1983	Cichlidae	Omnivore									14																			15		16																4	1
Cichlasoma bimaculatum (Linné, 1758)	Cichlidae	Omnivore																																										2
Corydoras geoffroy Lacepède, 1803	Benthic Siluriforme	Omnivore																																											1
Corydoras sp.	Benthic Siluriforme	Omnivore																	2
Creagrutus melanzonus Eigenmann, 1909	Characidae	unknown																							1
Crenicichla saxatilis (Linné, 1758)	Cichlidae	Piscivore			1			1		1	1																														1			1
Cteniloricaria maculata (Boeseman, 1971)	Benthic Siluriforme	unknown
Curimata cyprinoides (Linné, 1758)	Curimatidae	Detritivore			1	9	3	18	1	12						54	115			44	7		9	12	10			1				2		1	9		7							9		23	15
Cynopotamus essequibensis Eigenmann, 1912	Characidae	unknown									1																			2	1	4											1
Cyphocharax helleri (Steindachner, 1910)	Curimatidae	Herbivore																	1																									8
Cyphocharax sp.	Curimatidae	Detritivore			1	2			4	9	11							2		15						3				5														37	2	1		6
Cyphocharax spilurus (Günther, 1864)	Curimatidae	Detritivore		2	1	14		4	21	104	48							9		1			99		1	6	86			13		15			2		1							217	221	14	3	3
Dysichthys coracoideus (Cope, 1874)	Benthic Siluriforme	Detritivore				1															1
Doras carinatus (Linné, 1766)	Benthic Siluriforme	Omnivore		3	10	9				2	4	3											5		2		1				1	5	1					1				1			5			1	1
Doras micropoeus Eigenmann, 1909	Benthic Siluriforme	unknown																															1
Eigenmania virescens (Valenciennes, 1847)	Gymnotiformes	Aquatic invertivore				5		1		1	1							9	5					2		1						1	1	1			1					1		3	1	2	4	4
Electrophorus electricus (Linné, 1766)	Electrophoridae	Piscivore									1				1				1																							1
Galeocharax gulo (Cope, 1970)	Characidae	unknown	5	4																																		2	1
Geophagus harreri Gosse, 1975	Cichlidae	unknown																												1
Geophagus surinamensis (Bloch, 1791)	Cichlidae	Omnivore								2	8						2								2																	1			1	5	3	3
Guianacara owroewefi Kullander et Nijssen, 1989	Cichlidae	Detritivore									3
Gymnotus carapo Linné, 1758	Gymnotiformes	Aquatic invertivore	1
Harttia surinamensis Boeseman, 1971	Benthic Siluriforme	unknown																					2
Hemiodopsis huraulti Géry, 1964	Hemiodidae	unknown
Hemiodopsis quadrimaculatus (Pellegrin, 1908)	Hemiodidae	Herbivore	4	2	3	1		3	12										4		3	12	12			3	6			2	1	3				1		3				1		400	5			1
Hemiodus unimaculatus (Bloch, 1794)	Hemiodidae	Detritivore	9	4	6	6	5	12	15	16	3									40	4			6	8					11	4	54			4		4	5	7	35	29		2	24	26	1			4
Hemisorubim platyrhynchos (Cuvier et Valenciennes, 1840)	Benthic Siluriforme	Piscivore																																														1
Heros efasciatus Heckel, 1840	Cichlidae	Omnivore	1										5		3													4										1
Hoplerythrinus unitaeniatus (Spix, 1829)	Erythrinidae	Piscivore					1						1	4	5														1
Hoplias aimara (Valenciennes, 1840)	Erythrinidae	Piscivore		2				1	1												3	1		1	6	1									2		1							1	3	1	1	2
Hoplias malabaricus (Bloch, 1794)	Erythrinidae	Piscivore				6							15	8	16			2	5									6	4												1					1	2
Hypopomus artedi (Kaup, 1856)	Gymnotiformes	Aquatic invertivore																1																											1	1
Hypostomus gymnorhynchus (Norman, 1926)	Benthic Siluriforme	Detritivore		3	2			1		1	1											1	7		4	1		2		1										2	2			41	2	1		1
Krobia guianensis Regan, 1905	Cichlidae	Omnivore								8					1																														1
Lasiancistrus brevispinis Heitmans, Nijssen et Isbrücker, 1983	Benthic Siluriforme	Detritivore		1
Leporinus despaxi Puyo, 1943	Anostomidae	Herbivore	1																													3												4	1
Leporinus fasciatus (Bloch, 1794)	Anostomidae	Herbivore							1	1		2												5	4		1																	4	1
Leporinus fricerici (Bloch, 1794)	Anostomidae	Herbivore	3	6	15	2	3		14	23	3	5				2	6	5	13	2	2	3	10	4	4	18	5	1		4	1	7			1	1	1		1				5	52	5	1	1	2
Leporinus gossei Géry, Planquette et Le Bail, 1991	Anostomidae	Herbivore	3			1				1			11	1	15				12	1		2	3			2		6	2									5	1		1			7
Leporinus granti Eigenmann, 1912	Anostomidae	Omnivore							2																	1							1															1
Leporinus lebaili Géry et Planquette, 1983	Anostomidae	Herbivore									15	10												8	7						1	3	3									3	1					2	1
Leporinus maculatus Müller et Troschel, 1844	Anostomidae	Omnivore								2	1													4								1										1						4
Leporinus melanostictus Norman, 1926	Anostomidae	Herbivore																																				1	1
Loricaria cataphracta Linné, 1758	Benthic Siluriforme	Omnivore				2																																1								2	1
Lycengraulis batesii (Günther, 1868)	Engraulidae	Piscivore			1		1	15										1		1	1			2										3	1	1	2			1	3
Megalechis thoracata (Valenciennes, 1840)	Benthic Siluriforme	Detritivore			1										1																		1
Metynnis lippincotianus (Cope, 1870)	Serrasalmidae	Herbivore											2	11	8														3
Moenkhausia chrysargyrea (Günther, 1864)	Characidae	Omnivore							2	1							1											1																4	3
Moenkhausia collettii (Steindachner, 1882)	Characidae	Terrestrial invertivore
Moenkhausia georgiae Géry, 1966	Characidae	Terrestrial invertivore			1				2														5				2			14														5	3
Moenkhausia grandisquamis (Müller et Troschel, 1845)	Characidae	Omnivore	36	12	34	11	3	5			16	6									1			16	3					67	15	42	7				1	2	2			1	2					5
Moenkhausia oligolepis (Günther, 1864)	Characidae	Terrestrial invertivore			1				5								1									3	2																	11
Moenkhausia surinamensis Géry, 1965	Characidae	Omnivore			1				3	4						3					1	7	10				10			23														61
Myleus rhomboidalis (Cuvier, 1818)	Serrasalmidae	Herbivore		1		1																			1														1						24
Myleus rubripinnis (Linné et Valenciennes, 1849)	Serrasalmidae	Herbivore																													1								1
Myleus ternetzi (Norman, 1929)	Serrasalmidae	Herbivore	1	4	4	14	2	1	11	24	4							1	3	1		3	10	4	3	4	1			4	1	4		2	6		1	1	2					31	14
Pachypops fourcroi (Lacépède, 1802)	Sciaenidae	Omnivore			3	3												3	5					1	2							2			1
Parauchenipterus galeatus (Linné, 1766)	Auchenipteridae	Omnivore			30		3	4	1		1	2	10	13	14	1	1	15	12	7	5	1		3		1	7	83	68	4		10	5		4	1				6	8	3	3			4	2	1	10
Piabucus dentatus (Koelreuter, 1761)	Characidae	Herbivore			13	1	1										1																							2	4					34
Pimelodella cristata (Müller et Troschel, 1848)	Benthic Siluriforme	Detritivore	1			1				1										3					1												1							1	1
Pimelodella geryi Hoedeman, 1961	Benthic Siluriforme	Omnivore									5								1
Pimelodella megalops Eigenmann, 1912	Benthic Siluriforme	unknown									2																															1						3
Pimelodus blochii (Cuvier et Valenciennes, 1840)	Benthic Siluriforme	Omnivore				1
Pimelodus ornatus Kner, 1858	Benthic Siluriforme	Piscivore		1						2	2																															1			2
Plagioscion squamosissimus (Heckel, 1840)	Sciaenidae	Piscivore			3	1	1	1										1	1	1				5								1								3	2								1
Platydoras costatus (Linné, 1766)	Benthic Siluriforme	Omnivore									7	1													1								1									20	2			1		9	1
Poptella brevispina Reis, 1989	Characidae	Terrestrial invertivore			1	11	3	3	11	13	23	2				18	8	5	11	3	3	20	3			14	5			34		2		3	3				4	3	4			76	1	3		3
Potamorrhaphis guianensis (Schomburk, 1843)	Belonidae	unknown
Prochilodus reticulatus Cuvier et Valenciennes, 1849	Curimatidae	Detritivore																														12											2					3
Pseudancistrus barbatus (Cuvier et Valenciennes, 1840)	Benthic Siluriforme	unknown																							4													2
Pseudochenipterus nodosus (Bloch, 1794)	Auchenipteridae	Omnivore			9		5							2														72	231											13						7	1
Pseudoplatystoma fasciatum (Linné, 1766)	Benthic Siluriforme	Piscivore																														1										1
Pseudotylosurus microps (Günther 1866)	Belonidae	unknown			1
Pterengraulis atheniroides (Linné, 1766)	Engraulidae	Piscivore					1																	5
Pyrrhulina filamentosa Cuvier et Valenciennes, 1846	Lebiasinidae	Terrestrial invertivore																																										1
Rhamdia quelen (Quoy et Gaimard, 1824)	Benthic Siluriforme	Aquatic invertivore													1													2
Rhamphichthys rostratus (Linné, 1766)	Gymnotiformes	Aquatic invertivore									2																			2
Roeboexodon guyanensis (Puyo, 1948)	Characidae	Piscivore									4
Satanoperca jurupari Heckel, 1840	Cichlidae	Detritivore				8										1		1	9	2	4														1		2										3
Schizodon fasciatum Agassiz, 1829	Anostomidae	Herbivore									5	1												3							1	1										4	5					1	4
Semaprochilodus varii Castro, 1988	Curimatidae	Detritivore		1																				4						1	1
Serrasalmus humeralis Cuvier et Valenciennes, 1849	Serrasalmidae	Piscivore	7	12	1	2		4			12	2							2	1	2			1						3	1	7			1			4	3									2	4
Serrasalmus rhombeus Linné, 1766	Serrasalmidae	Piscivore									6	26						1	1					22	8					21	9	10	6										2					13	11
Serrasalmus striolatus Steindachner, 1908	Serrasalmidae	Herbivore																2		1										1		2
Sternopygus macrurus (Bloch et Schneider, 1801)	Gymnotiformes	Terrestrial invertivore																	1		1			1		2																					2
Symphurus plagusia (Bloch et Schneider, 1801)	Soleidae	Aquatic invertivore																																	1
Tarpon atlanticus Cuvier et Valenciennes, 1846	Megalopidae	Piscivore																										2	4											1	9					3	1
Tatia intermedia (Steindachner, 1876)	Auchenipteridae	Terrestrial invertivore																	1									2							1											1
Tetragonopterus chalceus Spix et Agassiz, 1829	Characidae	Omnivore	11									1													5					2	3	5						6	2				1						1
Triportheus rotundatus (Schomburk, 1841)	Characidae	Omnivore							10	10	21	35				17	13					7	7	88	16	12	5			21	23	52	52							46	59	6	48	135	8	29	10	25	40
TOTAL			353	170	419	205	120	212	159	263	311	113	48	59	99	123	159	183	163	431	243	96	260	261	123	86	158	200	352	416	175	447	210	86	72	52	109	280	128	141	130	59	93	1364	367	176	60	145	94
Planquette P., Keith P., Le Bail P.-Y., 1996, Atlas des Poissons d'eau douce de Guyane, tome 1. Coll. Patrimoine Naturel, vol.22. IEBG - MNHN - CSP, Min. Environnement, Paris.
Keith P., Le Bail P.-Y., Planquette P., 2000, Atlas des Poissons d'eau douce de Guyane, tome 2, fasc.1, Patrimoines naturels, MNHN-SPN, 43(I)
Le Bail P.-Y., Keith P., Planquette P., 2000, Atlas des Poissons d'eau douce de Guyane, tome 2, fasc.2, Patrimoines naturels, MNHN-SPN, 43(II)
[truncated: 7 more columns]
